# Supplementary material for: Two inorganic–organic hybrid silver-polyoxometalates as reusable catalysts for one-pot synthesis of propargylamines via a three-component coupling reaction at room temperature
Source: Royal Society of Chemistry journal article supplement (doi:10.1039/d0ce00042f), 2020-01-01
Supplement: d0ce00042f1.pdf [file d0ce00042f1.pdf]

# Two Inorganic-Organic Hybrid Silver-Polyoxometalates as Reusable Catalyst for One-Pot Synthesis of Propargylamines via Three-Component Coupling Reaction at Room Temperature

Ming-Yu Dou,<sup>a</sup> Xian-Qiang Huang<sup>\*b</sup> and Guo-Yu Yang,<sup>\*a</sup>

**Figure S1.** The FT-IR spectrum of compound 1.

**Figure S2.** The FT-IR spectrum of compound 2.

**Figure S3.** The simulated (black) and experimental (red) PXRD patterns of compound 1.

**Figure S4.** The simulated (black) and experimental (red) PXRD patterns of compound 2.

**Figure S5.** The FT-IR spectra of three runs cycles

**Figures S6-S33.** Gas chromatogram and mass spectrum of products 4

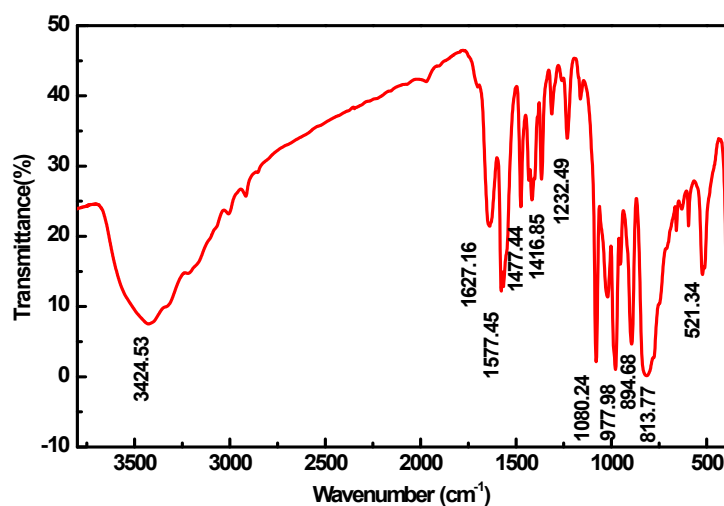

**Figure S1.** The FT-IR spectrum of compound 1.

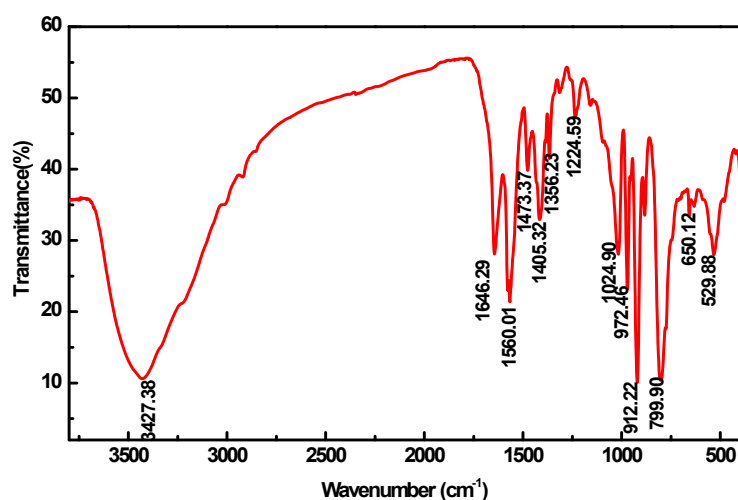

**Figure S2.** The FT-IR spectrum of compound 2.

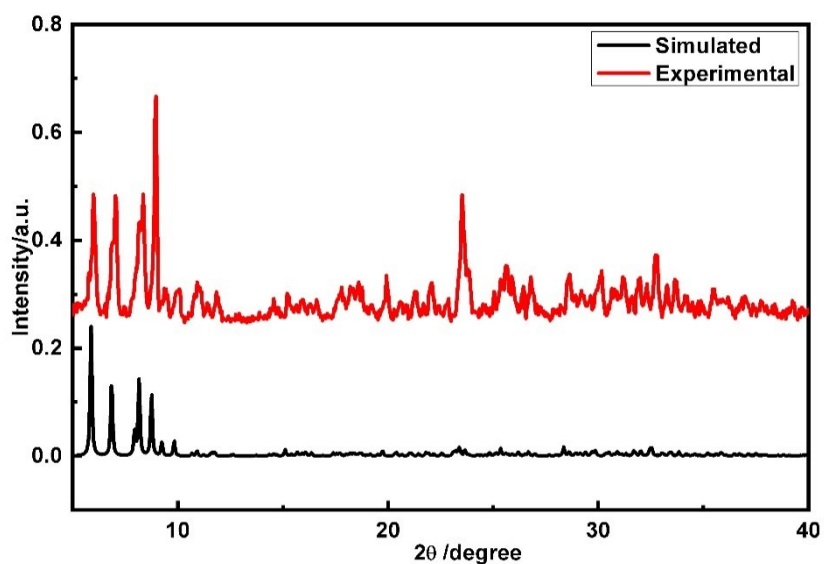

**Figure S3.** The simulated and experimental PXRD patterns of compound 1.

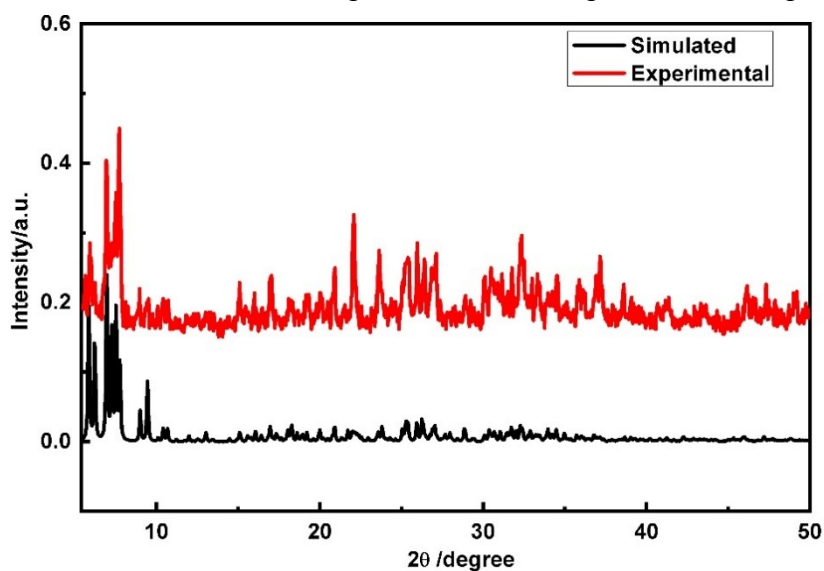

**Figure S4.** The simulated and experimental PXRD patterns of compound 2.

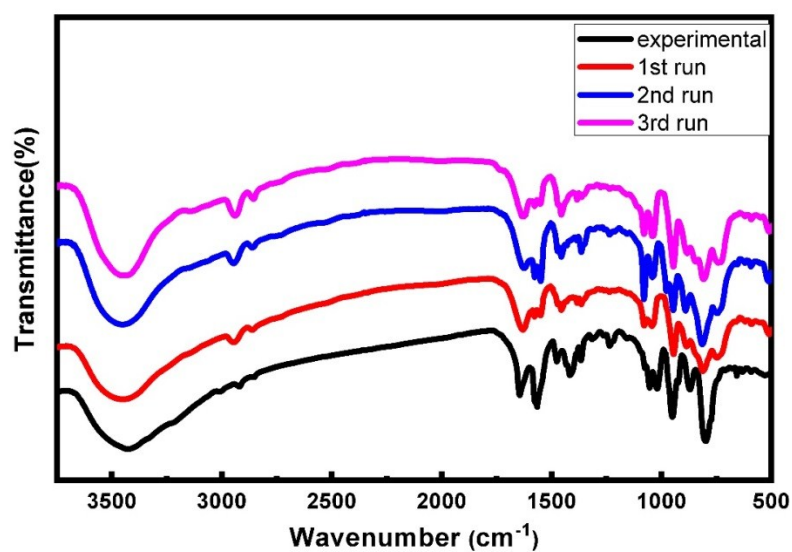

**Figure S5.** The FT-IR spectra of three runs cycles.

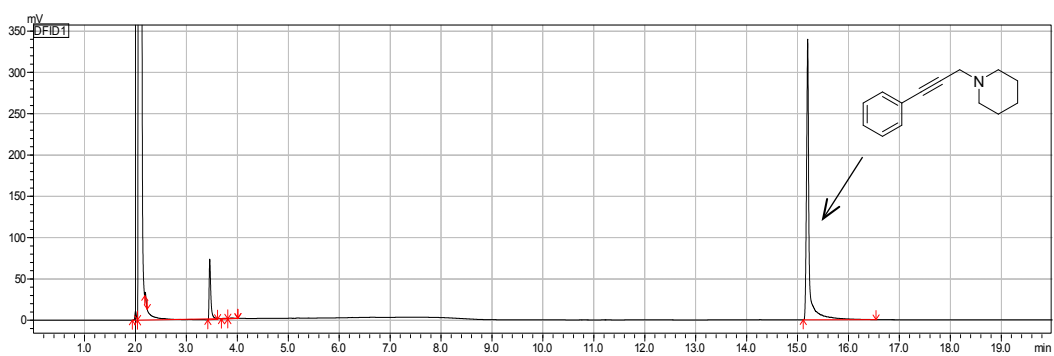

**Figure S6.** Gas chromatogram of product 4a

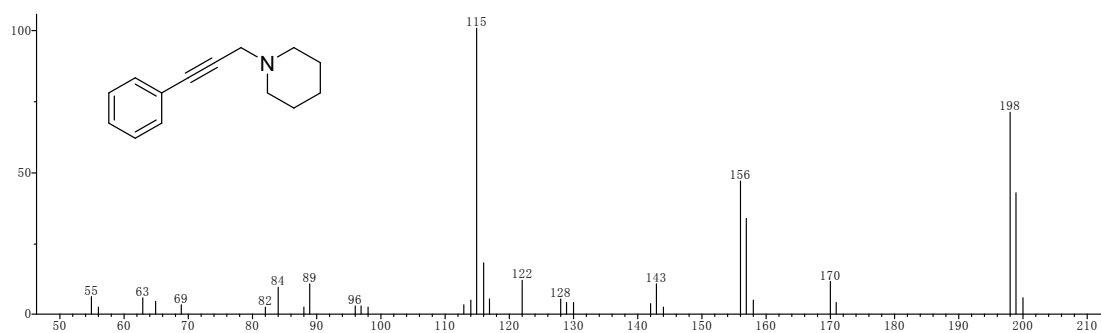

**Figure S7.** The mass spectrum of product 4a

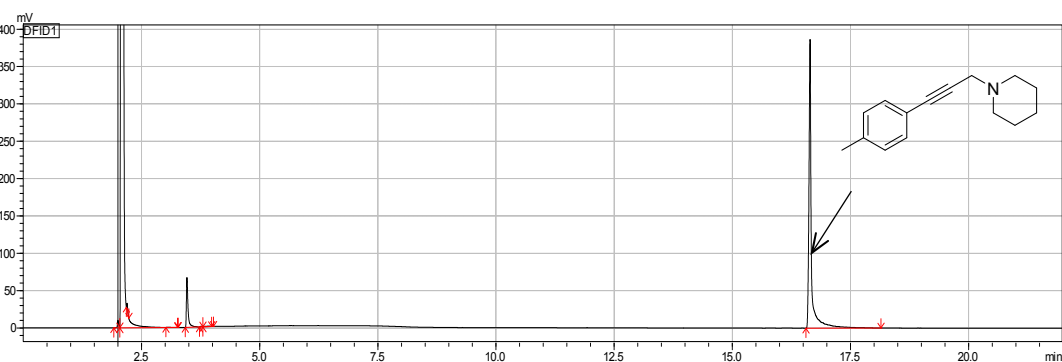

**Figure S8.** Gas chromatogram of product 4b

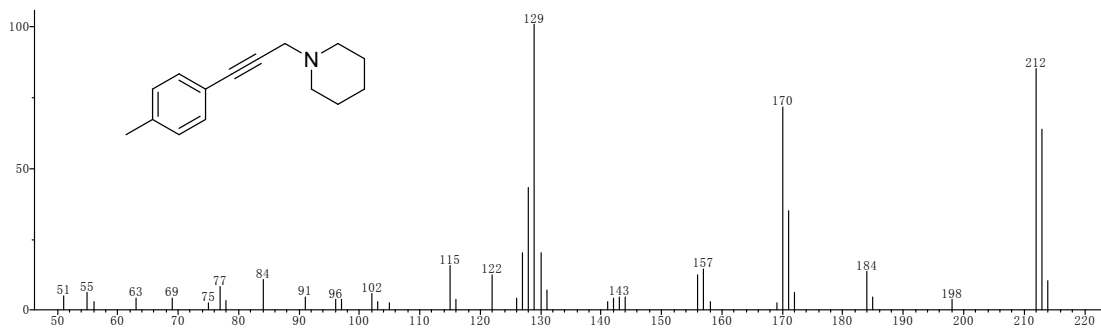

**Figure S9.** The mass spectrum of product 4b

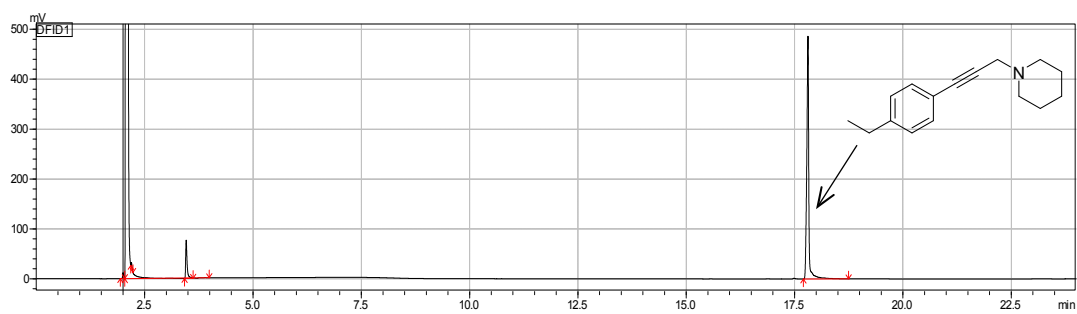

**Figure S10.** Gas chromatogram of product 4c

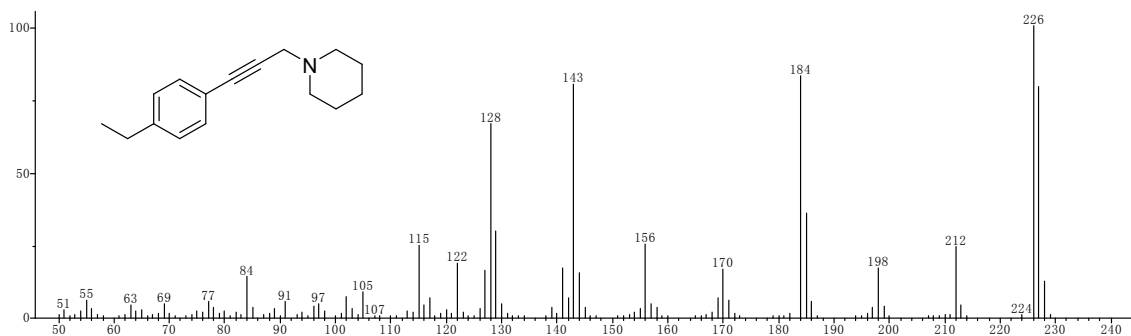

**Figure S11.** The mass spectrum of product 4c

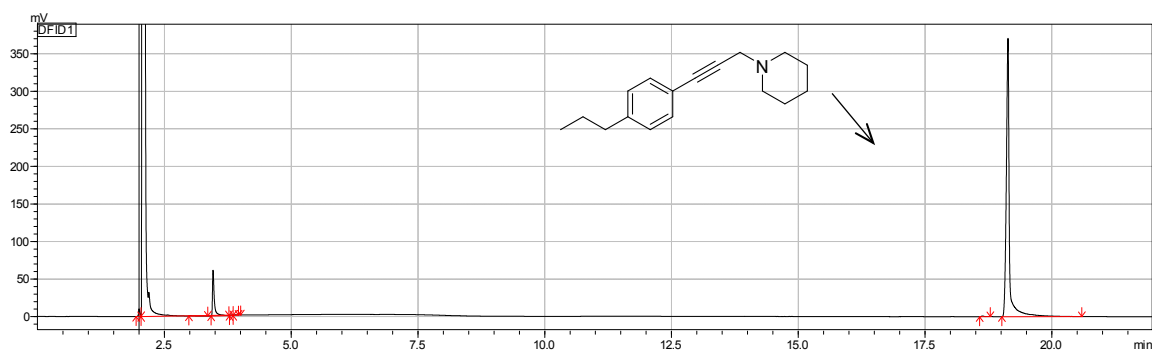

**Figure S12.** Gas chromatogram of product 4d

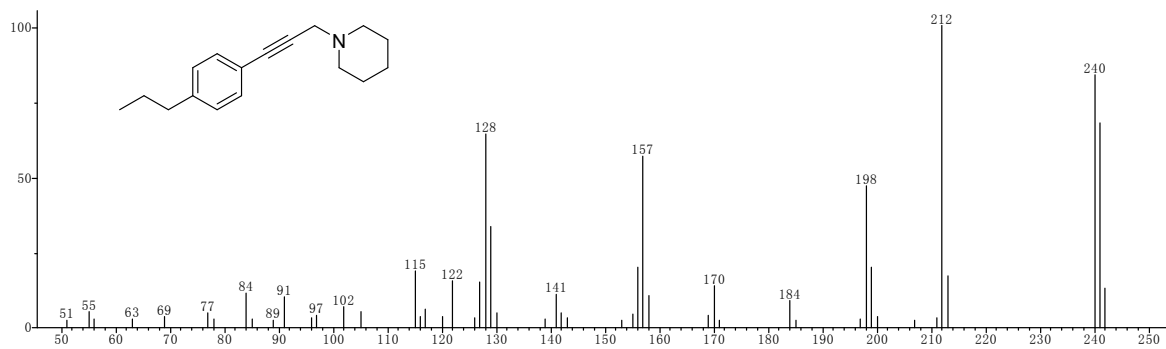

**Figure S13.** The mass spectrum of product 4d

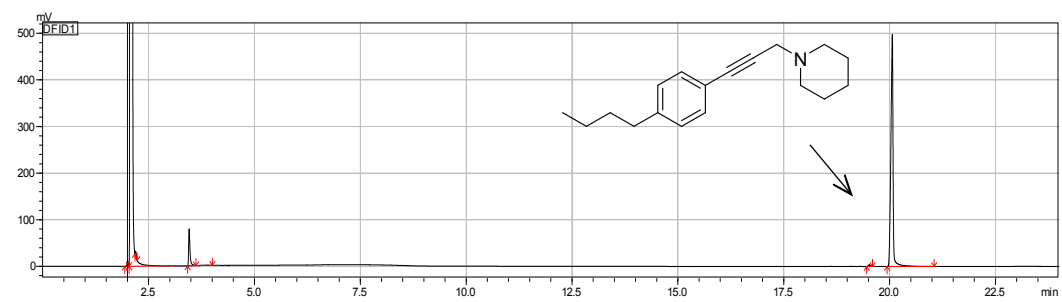

**Figure S14.** Gas chromatogram of product 4e

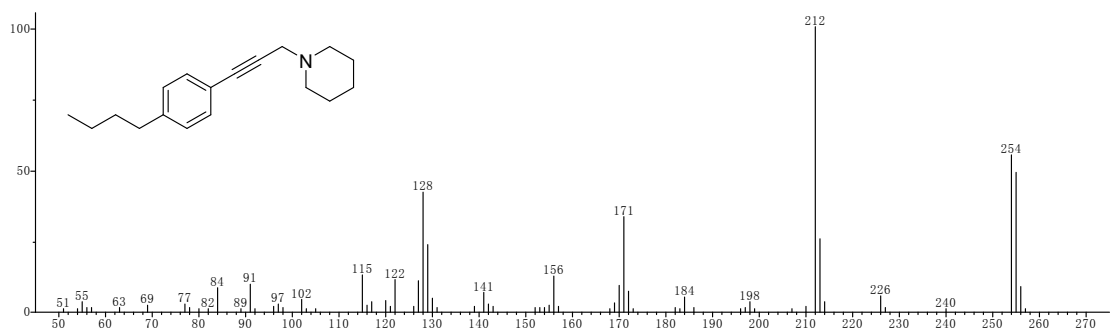

**Figure S15.** The mass spectrum of product 4e

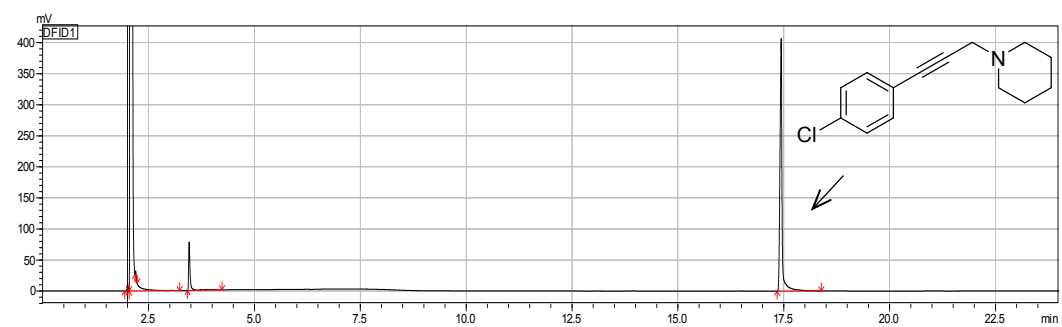

**Figure S16.** Gas chromatogram of product 4f

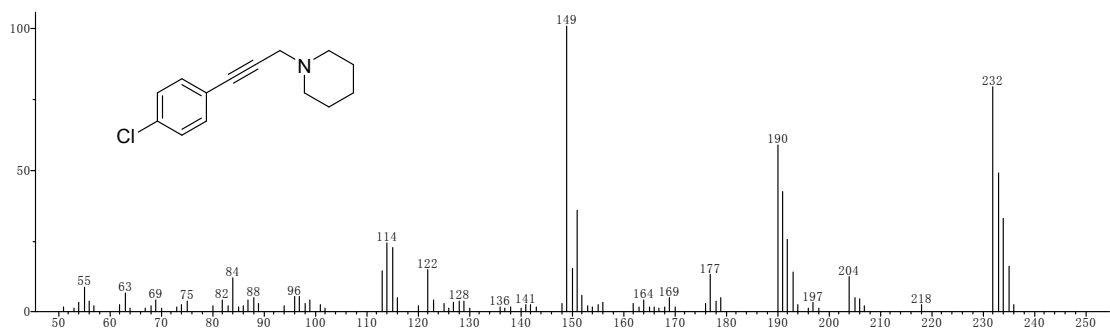

**Figure S17.** The mass spectrum of product 4f

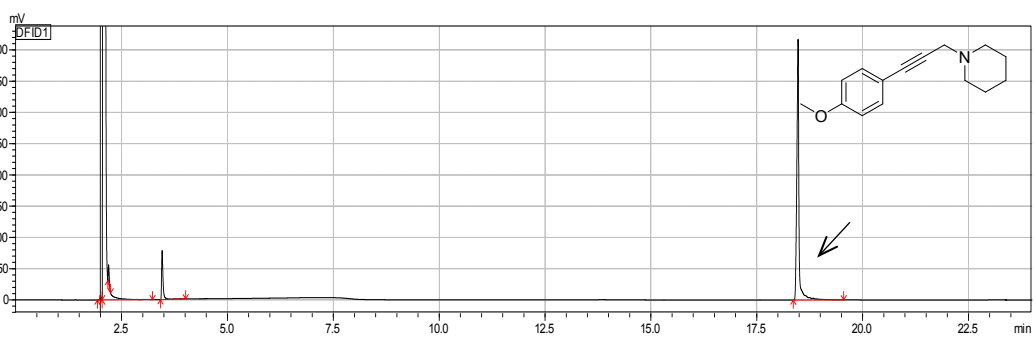

**Figure S18.** Gas chromatogram of product 4g

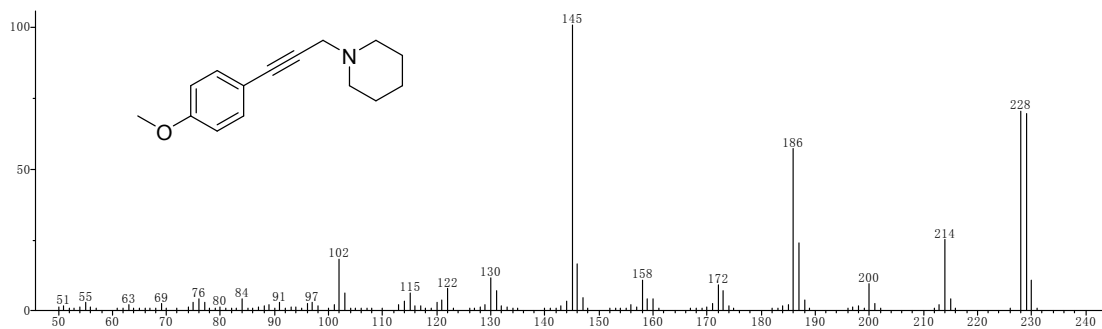

**Figure S19.** The mass spectrum of product 4g

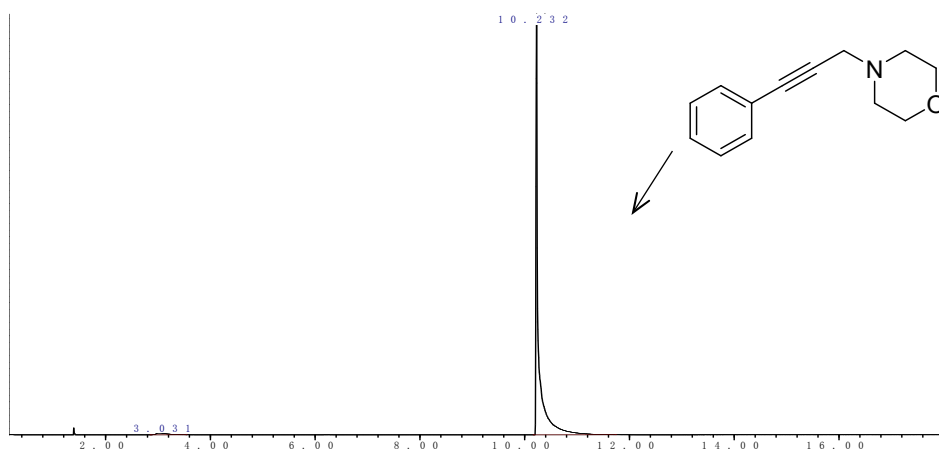

**Figure S20.** Gas chromatogram of product 4h

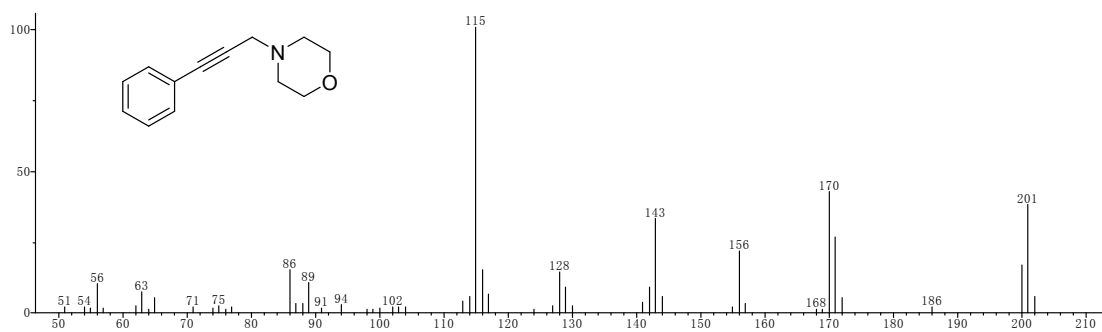

**Figure S21.** The mass spectrum of product 4h

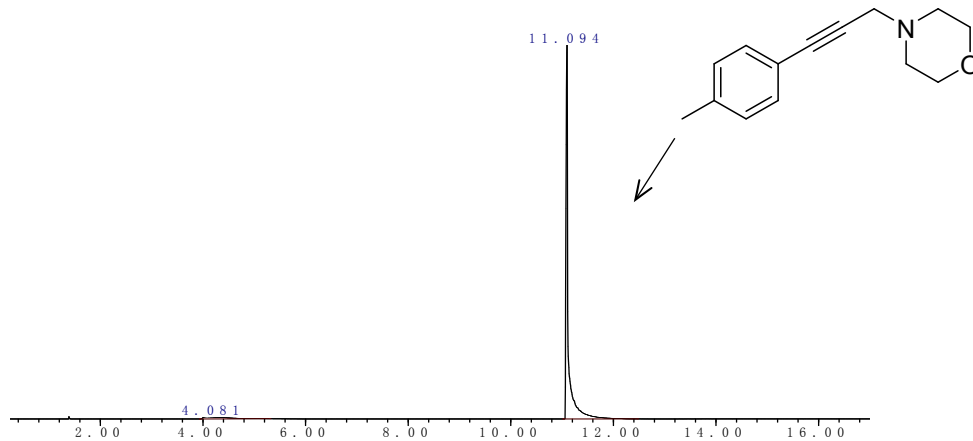

**Figure S22.** Gas chromatogram of product 4i

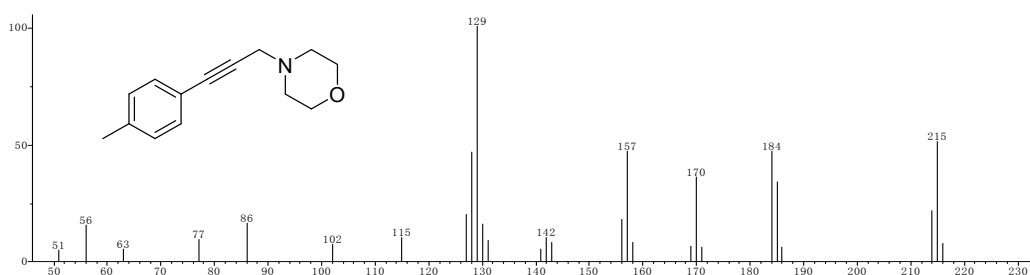

**Figure S23.** The mass spectrum of product 4i

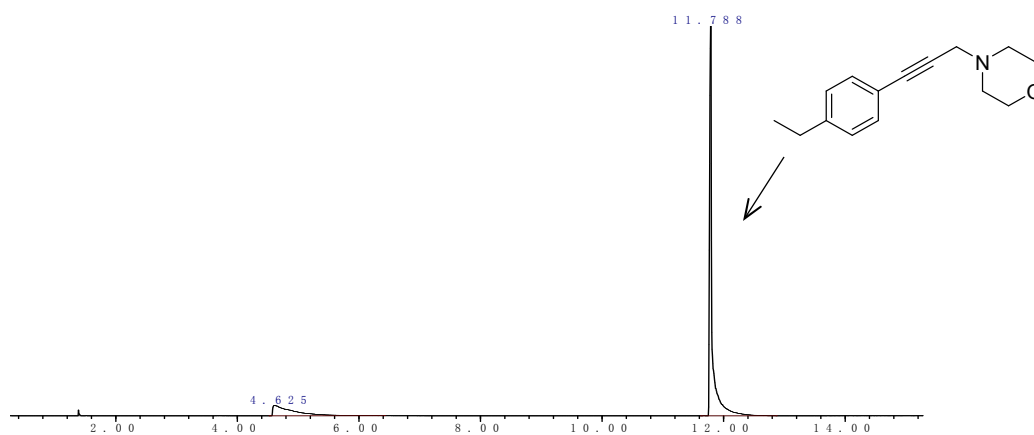

**Figure S24.** Gas chromatogram of product 4j

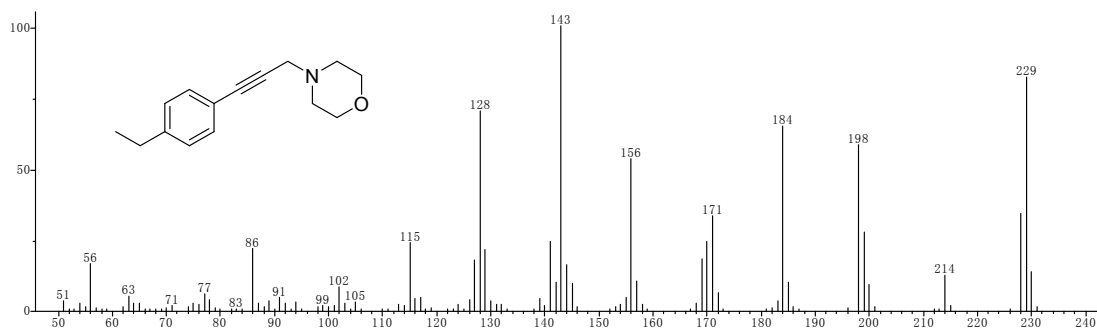

**Figure S25.** The mass spectrum of product 4j

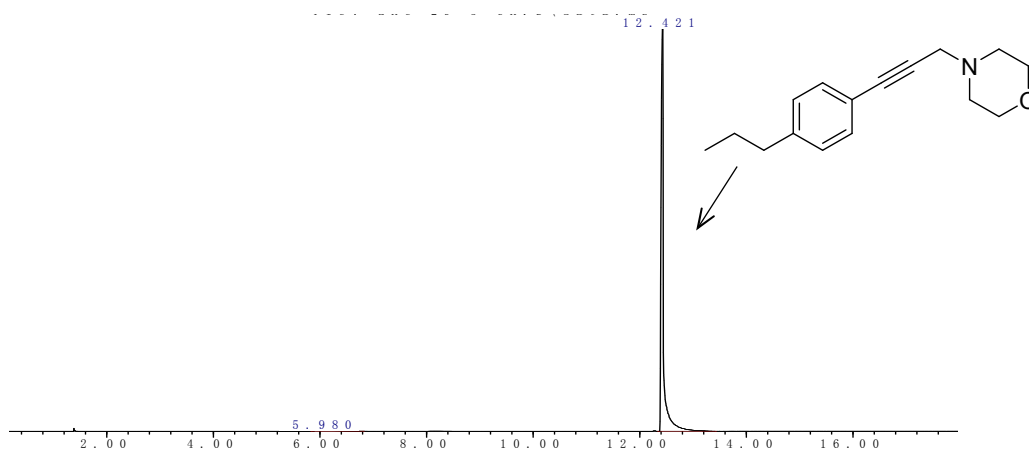

Figure S26. Gas chromatogram of product 4k

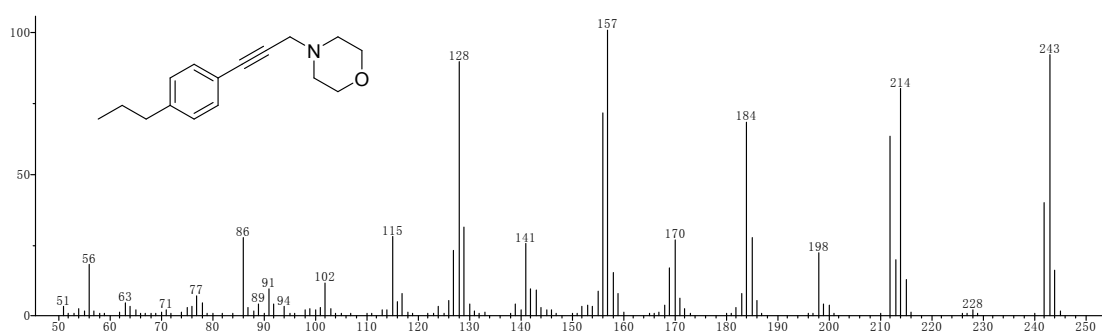

Figure S27. The mass spectrum of product 4k

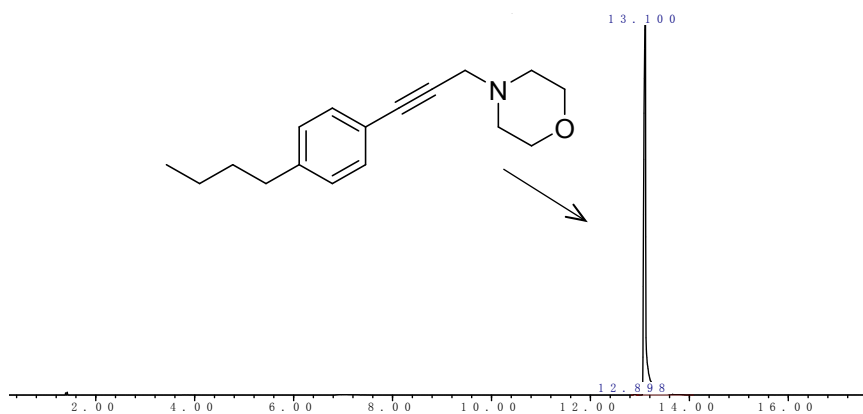

Figure S28. Gas chromatogram of product 4l

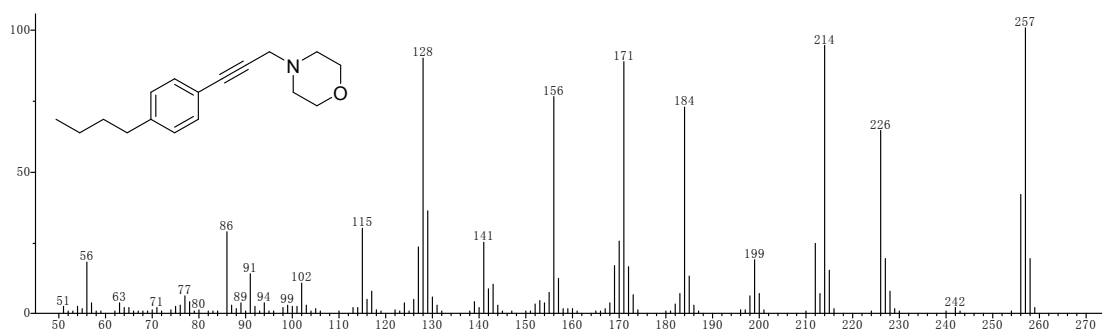

Figure S29. The mass spectrum of product 4l



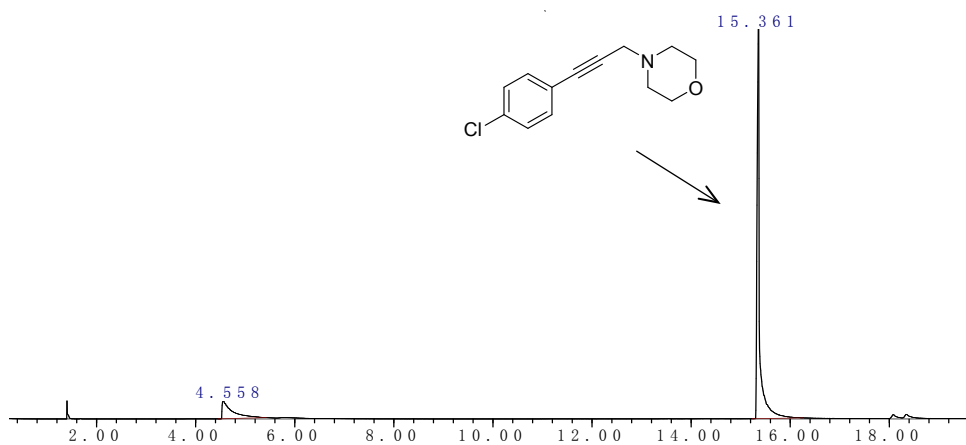

**Figure S30.** Gas chromatogram of product 4m

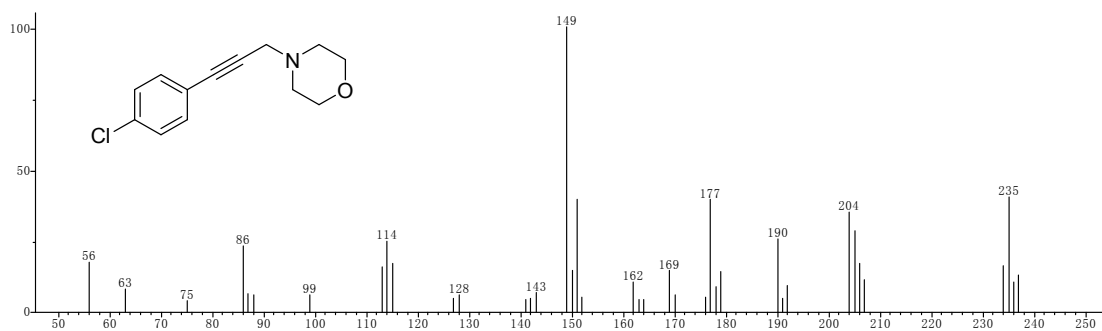

**Figure S31.** The mass spectrum of product 4m

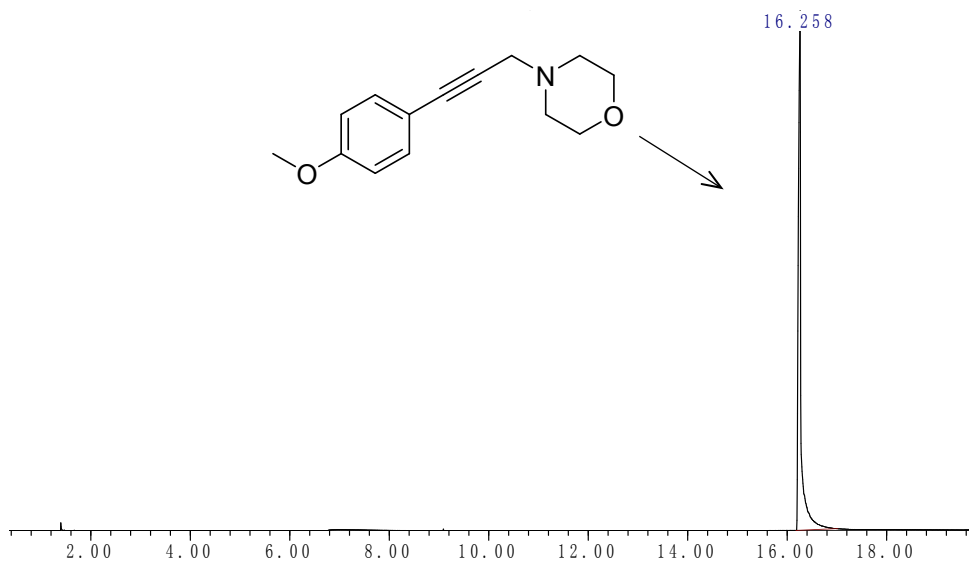

**Figure S32.** Gas chromatogram of product 4n

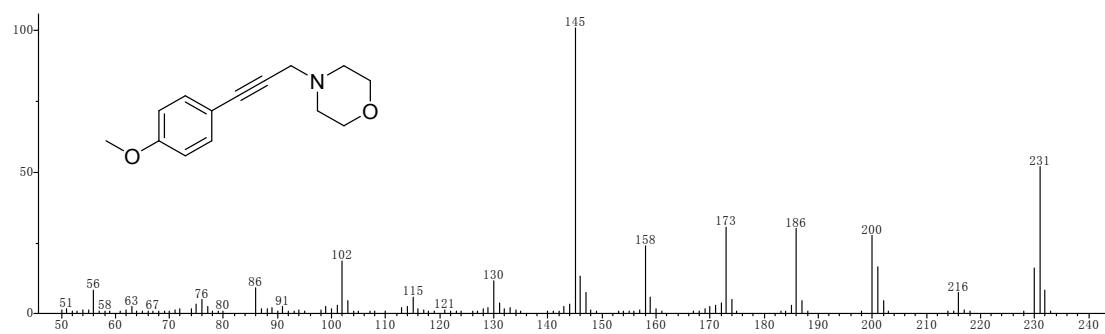

**Figure S33.** The mass spectrum of product 4n
